# Supplementary material
Source: PubMed Central journal article supplement (PMC9106866)
Supplement: NIHMS1775639-supplement-supinfo.pdf [file NIHMS1775639-supplement-supinfo.pdf]

**Supplement Table S1. List of ICD-9 and ICD-10 codes used to identify pneumonia**

|                                                       | <b>ICD-9</b> | <b>ICD-10</b> |
|-------------------------------------------------------|--------------|---------------|
| Viral pneumonia                                       | 480.x        | J12.xx        |
| Pneumonia due to adenovirus                           | 480.0        | J12.xx        |
| Pneumonia due to respiratory syncytial virus          | 480.1        | J12.xx        |
| Pneumonia due to parainfluenza virus                  | 480.2        | J12.xx        |
| Pneumonia due to other virus not classified otherwise | 480.8        | J12.xx        |
| Viral pneumonia                                       | 480.9        | J12.xx        |
| Pneumococcal pneumonia                                | 481          | J13           |
| Other bacterial pneumonia                             | 482.xx       | J15.xx        |
| Pneumonia due to Klebsiella pneumonia                 | 482.0        | J15.xx        |
| Pneumonia due to pseudomonas                          | 482.1        | J15.xx        |
| Pneumonia due to Haemophilus influenzae               | 482.2        | J15.xx        |
| Pneumonia due to Streptococcus                        | 482.3x       | J15.xx        |
| Pneumonia due to staphylococcus                       | 482.4x       | J15.xx        |
| Pneumonia due to other specified bacteria             | 482.8x       | J15.xx        |
| Bacterial pneumonia unspecified                       | 482.9        | J15.xx        |
| Pneumonia due to other specified organism             | 483.x        | J16.xx        |
| Pneumonia due to mycoplasma pneumoniae                | 483.0        | J15.7         |
| Pneumonia due to chlamydia                            | 483.1        | J16.0         |
| Pneumonia due to other specified organism             | 483.8        | J16.8         |
| Bronchopneumonia and pneumonia, organism unspecified  | 485          | J18.x         |

|                                                                    |        |                |
|--------------------------------------------------------------------|--------|----------------|
| Bronchopneumonia and pneumonia,<br>organism unspecified            | 486    | J18.x          |
| Pneumonia in infectious disease classified<br>elsewhere            | 484    | Not applicable |
| Pneumonia in cytomegalic inclusion<br>disease                      | 484.1  | B25.0          |
| Pneumonia in whooping cough                                        | 484.3  | A37.91         |
| Pneumonia in anthrax                                               | 484.5  | A22.1          |
| Pneumonia in aspergillosis                                         | 484.6  | B44.0          |
| Pneumonia in other systemic mycoses                                | 484.7  | J17            |
| Pneumonia in other infectious disease<br>classified elsewhere      | 484.8  | J17            |
| Influenza with pneumonia                                           | 487.0  | J11.00         |
| Ornithoses with pneumonia                                          | 73.0   | A70 with J17   |
| Pulmonary actinomycosis                                            | 39.1   | A42.0          |
| Post-measles pneumonia                                             | 55.1   | B05.2          |
| Salmonella pneumonia                                               | 003.22 | A02.22         |
| Pneumonia due to toxoplasmosis                                     | 130.4  | B58.3          |
| Pulmonary tularemia                                                | 21.2   | A21.2          |
| Varicella pneumonia                                                | 52.1   | B01.2          |
| Empyema with fistula                                               | 510.0  | J86.0          |
| Empyema without fistula                                            | 510.9  | J86.9          |
| Pleurisy with effusion, bacterial cause<br>other than tuberculosis | 511.11 | J90            |
| Abscess of lung                                                    | 513.0  | J85.1          |
| Pneumocytosis                                                      | 136.3  | B59            |
| Candidiasis of the lung                                            | 112.4  | B37.1          |
| Primary coccidioidomycosis                                         | 114.0  | B38.0          |

|                                      |        |                |
|--------------------------------------|--------|----------------|
| Histoplasmosis capsalatum pneumonia  | 115.05 | B39.2          |
| Histoplasmosis duboisii pneumonia    | 115.15 | B39.5 with J17 |
| Histoplasmosis unspecified pneumonia | 115.95 | B39.9 with J17 |
| Aspiration pneumonia                 | 507.0  | J69.0          |
